# Supplementary material for: Lineage‐specific plasmid acquisition and the evolution of specialized pathogens in Bacillus thuringiensis and the Bacillus cereus group
Source: PubMed Central journal article supplement (PMC5947300; doi:10.1111/mec.14546), 2018-04-02

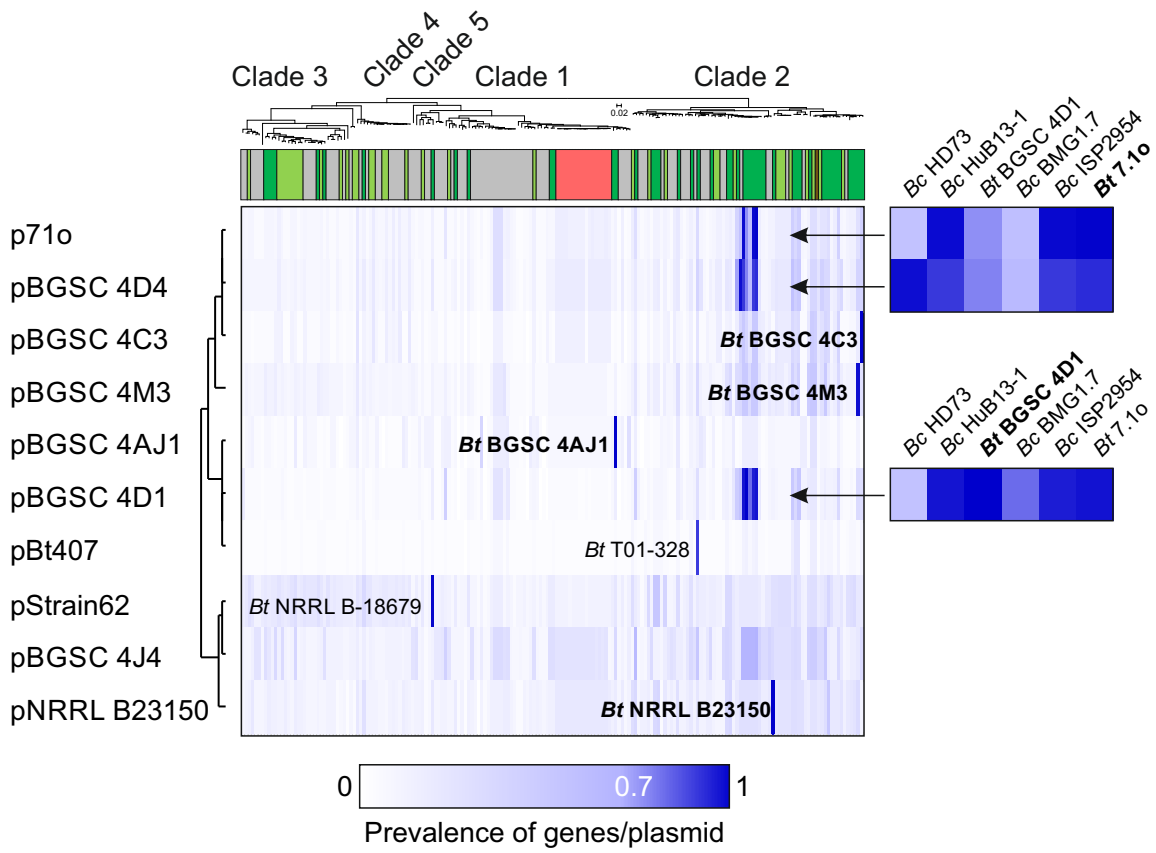

Supplement: MEC-27-1524-s003.pdf [file MEC-27-1524-s003.pdf]
